# Supplementary material for: Maternal obesity induces changes in adipokine profiles and modifies offspring gut microbiota at one month of age
Source: Research Square preprint supplement (doi:10.21203/rs.3.rs-8690359/v1), 2026-01-29
Supplement: Supplementary file 1 [file bc19d396e9f6c205eee1743e.docx]

**Supplementary Materials**

**Supplementary Table 1. Comparative characteristics of Mexican mother-infant pairs.**

|  | | **Total**  **N=46** | **NW**  **n=21** | **OW/OB**  **n=25** | **P-value** |
| --- | --- | --- | --- | --- | --- |
| ***Women: n (%) or mean ± SD*** | | | | | |
| Age at delivery (years) | | 23.95 ± 5.4 | 21.86 ± 3.97 | 25.72 ± 5.91 | **0.014 b** |
| Residence | Metropolitan area | 29 (63.0) | 11 (23.9) | 18 (39.1) | 0.170a |
| Non-Metropolitan area | 17 (37.0) | 10 (21.8) | 7 (15.2) |
| Maximum level of studies | Elementary School | 11 (23.91) | 6 (13.04) | 5 (10.87) | 0.391a |
| Middle School | 27 (58.70) | 13 (28.26) | 14 (30.43) |
| High school | 5 (10.87) | 2 (4.35) | 3 (6.52) |
| Higher education | 3 (6.52) | 0 (0.0) | 3 (6.52) |
| Occupation | Workers in domestic services | 2 (4.35) | 0 (0.0) | 2 (4.35) | 0.492a |
| Other workers with unspecified occupations | 44 (95.65) | 21 (45.65) | 23 (50.0) |
| High blood pressure¶ | Yes | 6 (13.04) | 0 (0.0) | 6 (13.04) | **0.016 a** |
| No | 40 (86.96) | 21 (45.65) | 19 (41.30) |
| Kidney disease¶ | Yes | 0 (0.0) | 0 (0.0) | 0 (0.0) | na c |
| No | 46 (100) | 21 (45.65) | 25 (54.35) |
| Hypercholesterolemia¶ | Yes | 5 (10.87) | 0 (0.0) | 5 (10.87) | **0.030 a** |
| No | 41 (89.13) | 21 (45.65) | 20 (43.48) |
| Type of birth based on gestation weeks | Pre-term | 0 (0.0) | 0 (0.0) | 0 (0.0) | na c |
| Term | 46 (100) | 21 (45.65) | 25 (54.35) |
| Initial birth type† | Spontaneous | 26 (56.52) | 14 (30.43) | 12 (26.09) | 0.203a |
|  | Induced | 20 (43.48) | 7 (15.22) | 13 (28.26) |  |
| Final birth outcome ‡ | Eutocic | 30 (65.22) | 16 (34.78) | 14 (30.43) | 0.152a |
| Dystocic | 16 (34.78) | 5 (10.87) | 11 (23.91) |
| Previous births (parity) | | 1.4 ± 1.2 | 1.57 ± 1.47 | 1.28 ± 0.94 | 0.419b |
| Number of children in current delivery | | 1 ± 0.0 | 1 ± 0.0 | 1 ± 0.0 | na c |
| Pre-pregnancy Systolic Blood Pressure (mmHg) | | 114.14 ± 19.7 | 112.6 ± 14.5 | 111.3 ± 33.1 | 0.867b |
| Pre-pregnancy  Diastolic Blood Pressure (mmHg) | | 69.27 ± 10.1 | 66.43 ± 6.9 | 71.8 ± 11.8 | 0.070b |
| Post-pregnancy (1stmonth)  Systolic Blood Pressure (mmHg) | | 109.98 ± 10.9 | 106.5 ± 12.9 | 112.92 ± 8.2 | 0.057 b |
| Post-pregnancy (1st month)  Diastolic Blood Pressure (mmHg) | | 74.07 ± 8.57 | 73.10 ± 9.4 | 74.88 ± 7.9 | 0.488b |
| Pre-pregnancy BMI (kg/m2) | | 27.10 ± 9.18 | 21.38 ± 2.24 | 32.3 ± 10.0 | **<0.001 b** |
| At-pregnancy BMI (kg/m2) | | 31.52 ± 7.59 | 25.87 ± 3.11 | 36.26 ± 6.97 | **<0.001 b** |
| Post-pregnancy (1st month) BMI (kg/m2) | | 27.85 ± 6.82 | 23.02 ± 2.54 | 31.91 ± 6.66 | **<0.001 b** |
| ***Infants: n (%) or mean ± SD*** | | | | | |
| Sex | Female | 25 (54.35) | 11 (23.91) | 14 (30.43) | 0.806 a |
| Male | 21 (45.65) | 10 (21.74) | 11 (23.91) |
| ***At birth*** |  |  |  |  |  |
| Weight (kg) | | 3.23 ± 0.42 | 3.14 ± 0.43 | 3.30 ± 0.40 | 0.189 b |
| Weight-for-age (WA) | | -0.170 ± 0.88 | -0.343 ± 0.95 | -0.020 ± 0.80 | 0.245 b |
| Weight-for-length (WL) | | -0.515 ± 1.32 | -0.73 ± 1.25 | -0.33 ± 1.38 | 0.321 b |
| Weight evaluation (N=43, n=20,23) | Risk of malnutrition§ | 9 (20.93) | 5 (11.63) | 4 (9.30) | 0.418a |
| Normal | 29 (67.44) | 14 (32.56) | 15 (34.88) |
| Risk of OW/OB | 5 (11.63) | 1 (2.33) | 4 (9.30) |
| Length (cm) | | 49.95 ± 2.11 | 49.95 ± 2.44 | 49.96 ± 1.85 | 0.992 b |
| Length-for-age (LA) | | 0.046 ± 0.98 | -0.05 ± 1.05 | 0.131 ± 0.94 | 0.552 b |
| Length evaluation  (N=43, n=20,23) | Stunted | 8 (18.60) | 4 (9.30) | 4 (9.30) | 0.826a |
| Normal | 35 (81.40) | 16 (37.21) | 19 (44.19) |
| Head circumference (cm) | | 34.0 ± 1.51 | 33.85 ± 1.09 | 34.14 ± 1.84 | 0.539 b |
| Head circumference-for-age (HCA) | | -0.115 ± 1.16 | -0.266 ± 0.815 | 0.02 ± 1.42 | 0.422 b |
| HCA evaluation (N=42, n=20,22) | Microcephaly | 2 (4.76) | 0 (0.0) | 2 (4.76) | 0.488a |
| Normal | 40 (95.24) | 20 (47.62) | 20 (47.62) |
| Macrocephaly | 0 (0.0) | 0 (0.0) | 0 (0.0) |
| ***1st month*** |  |  |  |  |  |
| Weight (kg) | | 4.54 ± 0.84 | 4.40 ± 0.71 | 4.65 ± 0.94 | 0.369 b |
| Weight-for-age (WA) | | -0.273 ± 1.11 | -0.40 ± 1.05 | -0.17 ± 1.18 | 0.510 b |
| Weight-for-length (WL) | | -0.663 ± 1.96 | -0.75 ± 1.95 | -0.60 ± 2.01 | 0.813 b |
| Weight evaluation  (N=40, n=18,22) | Risk of malnutrition§ | 5 (12.50) | 1 (2.50) | 4 (10.0) | **0.018 a** |
| Normal | 19 (47.50) | 13 (32.50) | 6 (15.0) |
| Risk of OW/OB | 16 (40.0) | 4 (10.0) | 12 (30.0) |
| Length (cm) | | 55.80 ± 3.79 | 55.0 ± 3.05 | 56.45 ± 4.26 | 0.232 b |
| Length-for-age (LA) | | 0.251±1.51 | 0.09±1.19 | 0.38±1.75 | 0.543 b |
| Length evaluation  (N=40, n=18,22) | Stunted | 6 (15.0) | 2 (5.0) | 4 (10.0) | 0.533a |
| Normal | 34 (85.0) | 16 (40.0) | 18 (45.0) |
| Head circumference (cm) | | 37.96 ± 0.51 | 38.11 ± 4.10 | 37.84 ± 2.44 | 0.807 b |
| Head circumference-for-age (HCA) | | 0.944 ± 2.76 | 1.09 ± 3.55 | 0.82 ± 1.99 | 0.776 b |
| HCA evaluation (N=42, n=20,22) | Microcephaly | 4 (10.0) | 1 (2.50) | 3 (7.50) | 0.195 a |
| Normal | 25 (62.50) | 14 (35.0) | 11 (27.50) |
| Macrocephaly | 11 (27.50) | 3 (7.50) | 8 (20.0) |
| ***Neonatal health assessments*** |  |  |  |  |  |
| Congenital anomalies | Yes | 1 (2.17) | 0 (0.0) | 1 (2.17) | na c |
| No | 45 (97.83) | 21 (45.65) | 24 (52.17) |
| APGAR Score | 0-3 (severe depression) | 0 (0.0) | 0 (0.0) | 0 (0.0) | na c |
| 7-10 (normal) | 46 (100.0) | 21 (45.65) | 25 (54.34) |
| Silverman-Andersen Score | 0 without RD | 41 (89.13) | 19 (41.30) | 22 (47.83) | na c |
| 1-3 RD mild | 4 (8.70) | 1 (2.17) | 3 (6.52) |
| 7-10 RD severe | 1 (2.17) | 1 (2.17) | 0 (0.0) |
| Hearing screening | Negative | 3 (6.52) | 0 (0.0) | 3 (6.52) | 0.236 a |
| Positive | 17 (36.96) | 9 (19.57) | 8 (17.39) |
| Not Specified | 26 (56.52) | 12 (26.09) | 14 (30.43) |

P-values in bold letters had significant differences (*p*<0.05). a Chi-Squared and Fisher's Exact test, b Student’s t-test, and c not applied.

¶ Obtained from medical records prior to pregnancy; no clinical examinations were conducted.
† Spontaneous: labor beginning naturally; Induced: labor initiated by medical intervention.

‡ Eutocic: normal vaginal delivery without intervention; Dystocic: abnormal labor requiring intervention.

§ Risk of malnutrition defined as underweight with weight-for-length z-scores below -2 SD from the WHO median.

**Supplementary Table 2. Comparative analysis of high blood pressure evaluation and adipokines levels from mothers of one-month postpartum.** Mann-Whitney U test was applied to evaluate significant differences between women with high blood pressure (Yes) versus women without it (No). Significant differences (*p*<0.05) are denoted with the bold letters. **Abbreviations:** HBM, Human Breast Milk; HBS, Human Blood Serum.

|  | | **N total** | **Mean** | **Standard Deviation** | **Units** | **Minimum** | **Median** | **Maximum** | **P-Value** |
| --- | --- | --- | --- | --- | --- | --- | --- | --- | --- |
| **HBM Adiponectin** | Yes | 5 | 10.06 | 12.10 | ng/mL | 0.25 | 5.38 | 30.37 | *p>*0.05 |
| No | 34 | 12.76 | 7.80 | ng/mL | 1.00 | 11.42 | 30.91 |
| **HBS Adiponectin** | Yes | 2 | 10604.47 | 3123.93 | µg/mL | 8395.52 | 10604.47 | 12813.43 | *p>*0.05 |
| No | 27 | 12994.74 | 12117.26 | µg/mL | 3955.22 | 9022.38 | 61567.16 |
| **HBM** **Leptin** | Yes | 6 | 0.56 | 0.25 | ng/mL | 0.38 | 0.43 | 1.02 | ***p*=0.005** |
| No | 35 | 0.50 | 0.95 | ng/mL | 0.18 | 0.22 | 5.42 |
| **HBS** **Leptin** | Yes | 5 | 9.24 | 2.18 | ng/mL | 5.56 | 9.45 | 11.16 | *p>*0.05 |
| No | 32 | 6.70 | 3.51 | ng/mL | 1.10 | 5.75 | 13.98 |
| **HBM**  **Resistin** | Yes | 3 | 0.41 | 0.11 | ng/mL | 0.33 | 0.34 | 0.54 | *p>*0.05 |
| No | 34 | 0.71 | 0.87 | ng/mL | 0.11 | 0.39 | 4.07 |
| **HBS** **Resistin** | Yes | 5 | 2.70 | 0.73 | ng/mL | 1.94 | 2.81 | 3.67 | *p>*0.05 |
| No | 34 | 2.76 | 1.82 | ng/mL | 0.37 | 2.40 | 8.42 |
| **HBM** **TNF-α** | Yes | 6 | 9.43 | 3.63 | pg/mL | 6.09 | 8.37 | 14.21 | *p>*0.05 |
| No | 33 | 16.56 | 13.22 | pg/mL | 1.17 | 11.00 | 48.56 |
| **HBS**  **TNF-α** | Yes | 5 | 21.96 | 6.59 | pg/mL | 14.89 | 19.96 | 30.96 | *p>*0.05 |
| No | 34 | 30.16 | 23.76 | pg/mL | 0.16 | 29.35 | 93.14 |
| **HBM** **IL-6** | Yes | 5 | 4.25 | 3.23 | pg/mL | 1.95 | 3.43 | 9.78 | *p>*0.05 |
| No | 31 | 18.74 | 25.27 | pg/mL | 0.07 | 5.86 | 111.51 |
| **HBS** **IL-6** | Yes | 5 | 2.94 | 1.63 | pg/mL | 1.46 | 2.19 | 5.12 | *p>*0.05 |
| No | 33 | 12.76 | 16.34 | pg/mL | 0.73 | 3.96 | 55.88 |

**Supplementary Table 3. Comparative analysis of hypercholesterolemia evaluation and adipokines levels from mothers of one-month postpartum.** Mann-Whitney U test was applied to evaluate significant differences between women with hypercholesterolemia (Yes) versus women without it (No). Significant differences (*p*<0.05) are denoted with bold letters. **Abbreviations:** HBM, Human Breast Milk; HBS, Human Blood Serum.

|  | | **N total** | **Mean** | **Standard Deviation** | **Units** | **Minimum** | **Median** | **Maximum** | **P-Value** |
| --- | --- | --- | --- | --- | --- | --- | --- | --- | --- |
| **HBM Adiponectin** | Yes | 35 | 12.56 | 8.57 | ng/mL | 0.25 | 11.36 | 30.91 | *p>*0.05 |
| No | 4 | 11.14 | 6.31 | ng/mL | 5.38 | 9.69 | 19.80 |
| **HBS Adiponectin** | Yes | 27 | 13263.12 | 12026.33 | µg/mL | 3955.22 | 9410.44 | 61567.16 | *p>*0.05 |
| No | 2 | 6981.34 | 1999.95 | µg/mL | 5567.16 | 6981.34 | 8395.52 |
| **HBM** **Leptin** | Yes | 36 | 0.37 | 0.41 | ng/mL | 0.18 | 0.23 | 2.50 | ***p*=0.041** |
| No | 5 | 1.46 | 2.22 | ng/mL | 0.21 | 0.61 | 5.42 |
| **HBS** **Leptin** | Yes | 34 | 6.83 | 3.41 | ng/mL | 1.10 | 5.75 | 13.98 | *p>*0.05 |
| No | 3 | 9.54 | 3.48 | ng/mL | 6.10 | 9.45 | 13.07 |
| **HBM Resistin** | Yes | 34 | 0.71 | 0.87 | ng/mL | 0.11 | 0.38 | 4.07 | *p>*0.05 |
| No | 3 | 0.43 | 0.09 | ng/mL | 0.33 | 0.44 | 0.52 |
| **HBS** **Resistin** | Yes | 36 | 2.57 | 1.58 | ng/mL | 0.37 | 2.26 | 8.42 | ***p*=0.022** |
| No | 3 | 5.02 | 1.99 | ng/mL | 2.81 | 5.55 | 6.69 |
| **HBM** **TNF-α** | Yes | 35 | 16.32 | 12.83 | pg/mL | 2.01 | 11.00 | 48.56 | *p>*0.05 |
| No | 4 | 8.01 | 5.11 | pg/mL | 1.17 | 8.84 | 13.20 |
| **HBS** **TNF-α** | Yes | 36 | 29.92 | 23.00 | pg/mL | 0.16 | 26.56 | 93.14 | *p>*0.05 |
| No | 3 | 19.45 | 11.70 | pg/mL | 8.79 | 17.59 | 31.97 |
| **HBM** **IL-6** | Yes | 32 | 18.36 | 24.97 | pg/mL | 0.07 | 6.11 | 111.51 | *p>*0.05 |
| No | 4 | 3.66 | 1.39 | pg/mL | 1.95 | 3.66 | 5.37 |
| **HBS** **IL-6** | Yes | 34 | 12.44 | 16.20 | pg/mL | 0.73 | 3.82 | 55.88 | *p>*0.05 |
| No | 4 | 3.21 | 1.24 | pg/mL | 1.46 | 3.57 | 4.23 |

**Supplementary Table 4. Comparative analysis of initial birth type evaluation and adipokines levels from mothers of one-month postpartum.** Mann-Whitney U test was applied to evaluate significant differences between women with induced versus spontaneous type of delivery. Significant differences (*p*<0.05) are denoted with bold letters. **Abbreviations:** HBM, Human Breast Milk; HBS, Human Blood Serum.

|  | | **N total** | **Mean** | **Standard Deviation** | **Units** | **Minimum** | **Median** | **Maximum** | **P-Value** |
| --- | --- | --- | --- | --- | --- | --- | --- | --- | --- |
| **HBM Adiponectin** | Induced | 17 | 12.98 | 9.23 | ng/mL | 1.00 | 11.36 | 30.57 | *p>*0.05 |
| Spontaneous | 22 | 11.97 | 7.72 | ng/mL | 0.25 | 10.638 | 30.91 |
| **HBS Adiponectin** | Induced | 11 | 9694.70 | 2613.87 | µg/mL | 5567.16 | 8716.41 | 13656.71 | *p>*0.05 |
| Spontaneous | 18 | 14745.85 | 14542.84 | µg/mL | 3955.22 | 9518.65 | 61567.16 |
| **HBM** **Leptin** | Induced | 18 | 0.55 | 0.55 | ng/mL | 0.19 | 0.36 | 2.50 | ***p*=0.003** |
| Spontaneous | 23 | 0.47 | 1.08 | ng/mL | 0.18 | 0.21 | 5.42 |
| **HBS** **Leptin** | Induced | 16 | 8.54 | 3.38 | ng/mL | 2.64 | 9.39 | 13.98 | ***p*=0.022** |
| Spontaneous | 21 | 5.91 | 3.11 | ng/mL | 1.10 | 5.28 | 13.87 |
| **HBM Resistin** | Induced | 15 | 0.55 | 0.55 | ng/mL | 0.11 | 0.38 | 2.50 | *p>*0.05 |
| Spontaneous | 22 | 0.78 | 0.98 | ng/mL | 0.33 | 0.39 | 4.07 |
| **HBS Resistin** | Induced | 17 | 3.06 | 1.73 | ng/mL | 0.37 | 2.81 | 6.69 | *p>*0.05 |
| Spontaneous | 22 | 2.52 | 1.71 | ng/mL | 0.46 | 2.00 | 8.42 |
| **HBM** **TNF-α** | Induced | 17 | 14.14 | 11.05 | pg/mL | 2.01 | 10.66 | 45.01 | *p>*0.05 |
| Spontaneous | 22 | 16.49 | 13.65 | pg/mL | 1.17 | 10.66 | 48.56 |
| **HBS** **TNF-α** | Induced | 17 | 29.49 | 22.60 | pg/mL | 3.01 | 22.50 | 88.83 | *p>*0.05 |
| Spontaneous | 22 | 28.81 | 22.81 | pg/mL | 0.16 | 28.84 | 93.14 |
| **HBM** **IL-6** | Induced | 16 | 14.75 | 28.50 | pg/mL | 0.07 | 3.90 | 111.51 | *p>*0.05 |
| Spontaneous | 20 | 18.30 | 20.28 | pg/mL | 0.24 | 6.60 | 62.00 |
| **HBS** **IL-6** | Induced | 17 | 7.66 | 12.14 | pg/mL | 0.73 | 2.91 | 50.00 | *p>*0.05 |
| Spontaneous | 21 | 14.55 | 17.56 | pg/mL | 0.73 | 4.23 | 55.88 |

.

**Supplementary Table 5. Comparative analysis of final birth outcome evaluation and adipokines levels from mothers of one-month postpartum.** Mann-Whitney U test was applied to evaluate significant differences between women with eutocic versus dystocic type of delivery. Significant differences (*p*<0.05) are denoted with bold letters. **Abbreviations:** HBM, Human Breast Milk; HBS, Human Blood Serum.

|  | | **N total** | **Mean** | **Standard Deviation** | **Units** | **Minimum** | **Median** | **Maximum** | **P-Value** |
| --- | --- | --- | --- | --- | --- | --- | --- | --- | --- |
| **HBM Adiponectin** | Eutocic | 27 | 13.74 | 7.86 | ng/mL | 2.74 | 11.49 | 30.57 | *p>*0.05 |
| Dystocic | 12 | 9.43 | 8.86 | ng/mL | 0.25 | 6.69 | 30.91 |
| **HBS Adiponectin** | Eutocic | 24 | 13817.16 | 12642.41 | µg/mL | 3955.22 | 9324.62 | 61567.164 | *p>*0.05 |
| Dystocic | 5 | 8091.04 | 2556.71 | µg/mL | 5567.16 | 8074.62 | 11641.79 |
| **HBM** **Leptin** | Eutocic | 27 | 0.27 | 0.16 | ng/mL | 0.18 | 0.22 | 1.02 | ***p*=0.019** |
| Dystocic | 14 | 0.95 | 1.41 | ng/mL | 0.19 | 0.50 | 5.42 |
| **HBS** **Leptin** | Eutocic | 25 | 6.68 | 3.49 | ng/mL | 1.10 | 5.74 | 13.87 | *p>*0.05 |
| Dystocic | 12 | 7.81 | 3.38 | ng/mL | 3.96 | 6.89 | 13.98 |
| **HBM** **Resistin** | Eutocic | 25 | 0.74 | 0.93 | ng/mL | 0.24 | 0.38 | 4.07 | *p>*0.05 |
| Dystocic | 12 | 0.59 | 0.61 | ng/mL | 0.11 | 0.41 | 2.5 |
| **HBS** **Resistin** | Eutocic | 27 | 2.42 | 1.70 | ng/mL | 0.37 | 2.00 | 8.42 | ***p*=0.028** |
| Dystocic | 12 | 3.50 | 1.55 | ng/mL | 1.92 | 2.83 | 6.69 |
| **HBM** **TNF-α** | Eutocic | 25 | 15.95 | 12.74 | pg/mL | 3.38 | 10.32 | 48.56 | *p>*0.05 |
| Dystocic | 14 | 14.60 | 12.42 | pg/mL | 1.17 | 11.67 | 45.01 |
| **HBS** **TNF-α** | Eutocic | 27 | 27.87 | 18.23 | pg/mL | 0.16 | 26.73 | 60.65 | *p>*0.05 |
| Dystocic | 12 | 31.89 | 30.64 | pg/mL | 3.01 | 21.91 | 93.14 |
| **HBM** **IL-6** | Eutocic | 22 | 17.42 | 19.61 | pg/mL | 0.07 | 7.51 | 62.00 | *p>*0.05 |
| Dystocic | 14 | 15.64 | 30.39 | pg/mL | 0.24 | 3.55 | 111.51 |
| **HBS** **IL-6** | Eutocic | 26 | 13.16 | 17.53 | pg/mL | 0.73 | 3.30 | 55.88 | *p>*0.05 |
| Dystocic | 12 | 7.80 | 9.77 | pg/mL | 0.79 | 4.23 | 33.82 |

| **A)**  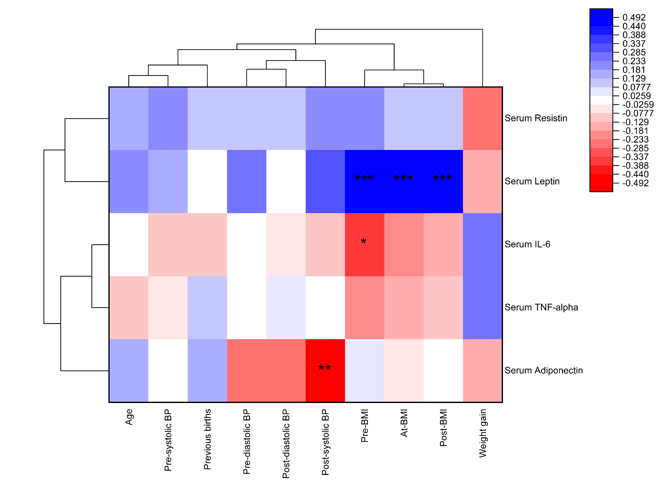  **B)**  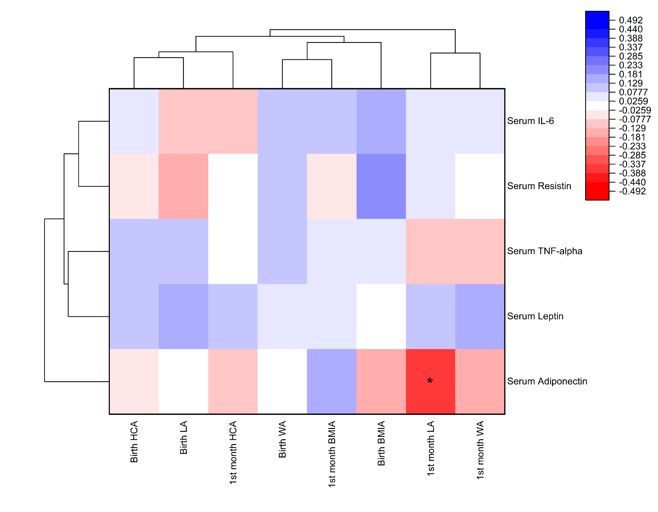 |
| --- |

**Supplementary Figure 1.** **Heatmaps and dendrogram of Spearman’s correlation coefficients between adipokines concentrations in HBS at one-month postpartum with mother-infant characteristics.** Hierarchical clustering of variables is shown along both the vertical and horizontal axes.

Correlations of A) mother, B) Infant. Age in years and blood pressure in mmHg. Significance levels are denoted as * for *p*<0.05, ** for *p*<0.01 and *** for *p*<0.001. Abbreviations: HBS, Human Blood Serum; BMI, Body Mass Index; Pre-BMI, pre-pregnancy BMI; At-BMI, at birth BMI; Post-BMI, postpartum BMI; BP, Blood pressure; pre-BP, pre-delivery blood pressure; HCA, head-circumference-for-age; LA, length-for-age; WA, weight-for-age.


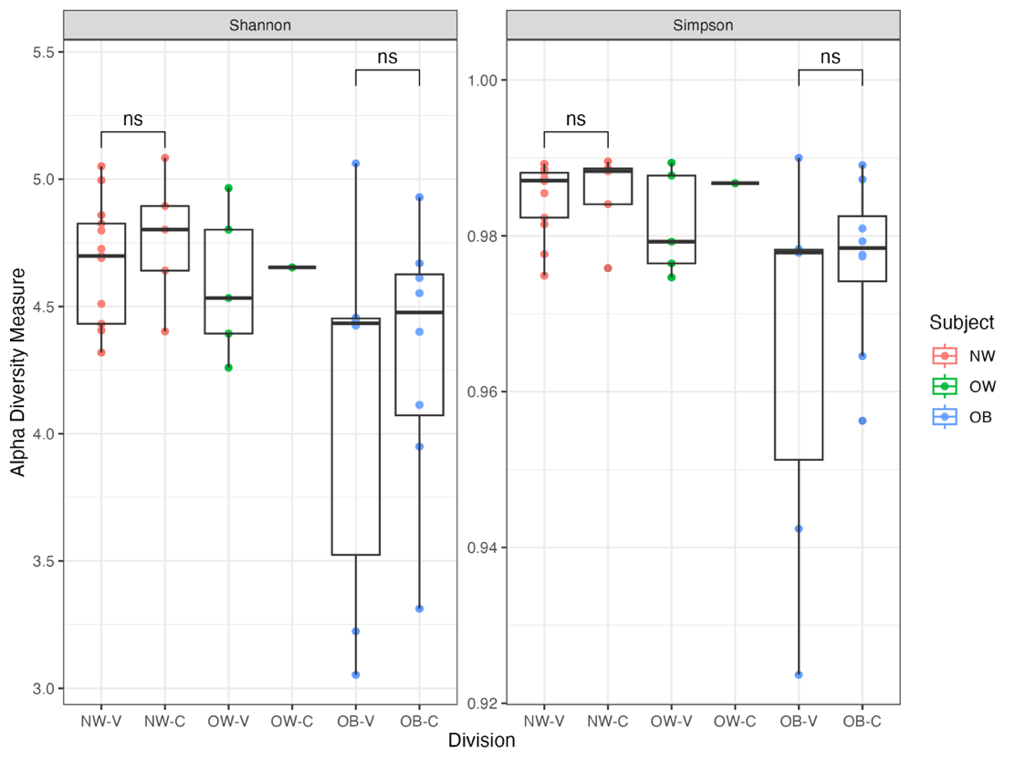


**Supplementary Figure 2. Alpha diversity of infant gut microbiota of one-month-old based on mother pre-gestational BMI and delivery mode.** Classification of microbial alpha diversity based on infants born to mothers with different BMI and delivery mode. **Abbreviations:** NW, normoweight; OW, overweight; OB, obesity; C, cesarean; V, vaginal.

| **A)**  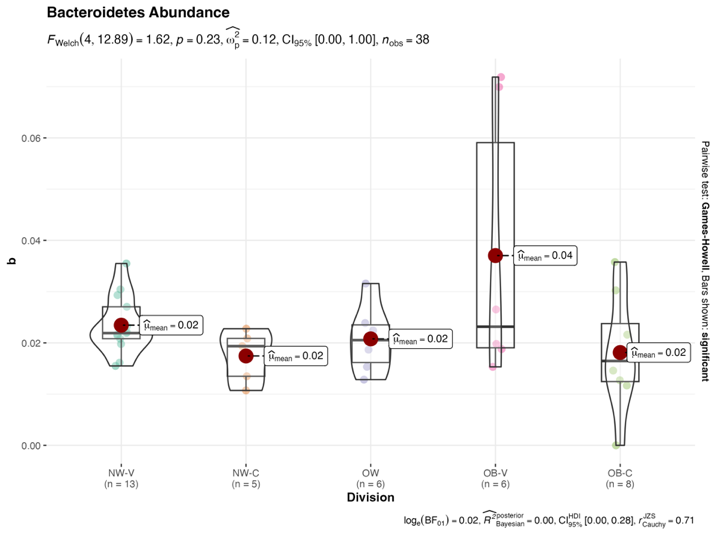 |
| --- |
| **B)**  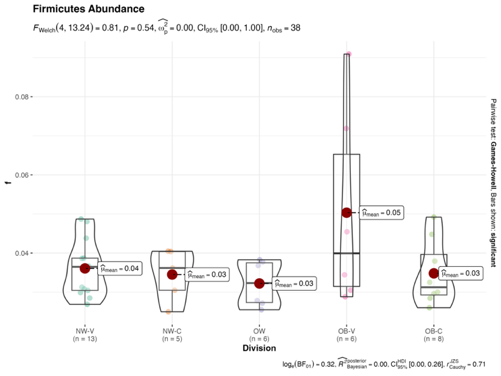 |
| **C)**  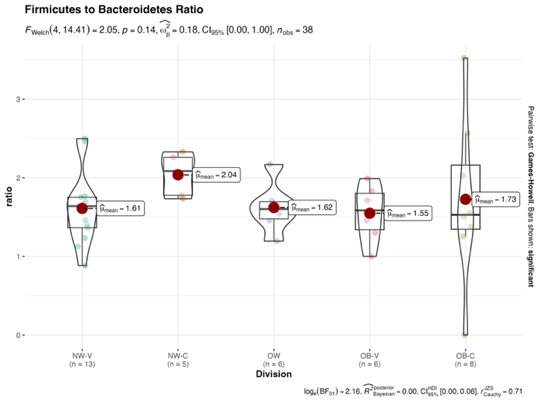 |

**Supplementary Figure 3. Abundances and ratios of Bacteroidetes and Firmicutes in gut microbiota from breastfed infants, classified by maternal BMI and delivery modes.** **A)** Bacteroidetes abundance**, B)** Firmicutes abundance and **C)** Firmicutes-to- Bacteroidetes Ratio. **Abbreviations:** NW, normoweight; OW, overweight; OB, obesity.
